# Supplementary material for: Bacterial response to glucose addition: growth and community structure in seawater microcosms from North Pacific Ocean
Source: PubMed Central journal article supplement (PMC9825388; doi:10.1038/s41598-022-27251-2), 2023-01-07
Supplement: 41598_2022_27251_MOESM1_ESM.pdf [file 41598_2022_27251_MOESM1_ESM.pdf]

## Supplementary data

Supplementary Table 1. Amounts of glucose ( $C_6H_{12}O_6$ ), sodium nitrate ( $NaNO_3$ ), and sodium dihydrogen phosphate ( $NaH_2PO_4/2H_2O$ ) added per liter (l) of water in the treated microcosms. Carbon (C), Nitrogen (N) and phosphorus (P) were added at ratio C: N: P = 200:10:1

| <b>Glucose</b>               |                                       | <b>Sodium Nitrate (<math>NaNO_3</math>)</b> |                                       | <b>Sodium di-hydrogen phosphate (<math>NaH_2PO_4 \cdot 2H_2O</math>)</b> |                                    |
|------------------------------|---------------------------------------|---------------------------------------------|---------------------------------------|--------------------------------------------------------------------------|------------------------------------|
| Doses<br>( $mg\ C\ l^{-1}$ ) | Treated<br>amount<br>( $mg\ l^{-1}$ ) | Doses<br>( $mg\ N\ l^{-1}$ )                | Treated<br>amount<br>( $mg\ l^{-1}$ ) | Doses<br>( $mg\ P\ l^{-1}$ )                                             | Treated amount<br>( $mg\ l^{-1}$ ) |
| 20                           | 50                                    | 1                                           | 6.07                                  | 0.1                                                                      | 0.387                              |
| Control                      |                                       |                                             | No treatment                          |                                                                          |                                    |

Supplementary Table 2: Linear discriminant analysis (LDA) effect size (LEfSe) among the control and treated samples of the North Pacific Sub-polar Gyre, SPG (surface and chlorophyll maximum). The differences were significant ( $p < 0.05$ ) among classes (Kruskal-Wallis test). The threshold of the logarithmic LDA score was  $>3.0$ . A. *Order* level for SPG surface samples, B. *Class* level for SPG surface samples, C. *Order* level for SPG chlorophyll maximum samples, and D. *Class* level for SPG chlorophyll maximum samples.

#### A

| <b>Orders</b>               | <b>P values</b> | <b>FDR</b> | <b>Control samples</b> | <b>Treated samples</b> | <b>LDA score</b> |
|-----------------------------|-----------------|------------|------------------------|------------------------|------------------|
| Opitutales (100)            | 0.009           | 0.054      | 218690                 | 43066                  | -4.94            |
| Flavobacteriales (100)      | 0.028           | 0.085      | 1311700                | 1028000                | -5.15            |
| SAR11_clade (100)           | 0.251           | 0.376      | 5884100                | 6181800                | 5.17             |
| Bacteria_unclassified (100) | 0.251           | 0.376      | 169360                 | 239670                 | 4.55             |
| Pseudomonadales (100)       | 0.754           | 0.905      | 2142000                | 2238600                | 4.68             |
| Rhodobacterales (100)       | 0.917           | 0.917      | 274100                 | 268900                 | -3.42            |

#### B

| <b>Classes</b>              | <b>P values</b> | <b>FDR</b> | <b>Control samples</b> | <b>Treated samples</b> | <b>LDA score</b> |
|-----------------------------|-----------------|------------|------------------------|------------------------|------------------|
| Verrucomicrobiae (100)      | 0.009           | 0.045      | 218690                 | 43066                  | -4.94            |
| Bacteroidia (100)           | 0.028           | 0.071      | 1311700                | 1028000                | -5.15            |
| Alphaproteobacteria (100)   | 0.175           | 0.291      | 6158200                | 6450700                | 5.17             |
| Bacteria_unclassified (100) | 0.251           | 0.313      | 169360                 | 239670                 | 4.55             |
| Gammaproteobacteria (100)   | 0.754           | 0.754      | 2142000                | 2238600                | 4.68             |

**C**

| <b>Orders</b>          | <b>P values</b> | <b>FDR</b> | <b>Control samples</b> | <b>Treated samples</b> | <b>LDA score</b> |
|------------------------|-----------------|------------|------------------------|------------------------|------------------|
| Flavobacteriales (100) | 0.028           | 0.141      | 1119200                | 750810                 | -5.27            |
| Pseudomonadales (100)  | 0.347           | 0.581      | 2047200                | 2252600                | 5.01             |
| Actinomarinales (100)  | 0.465           | 0.581      | 249540                 | 213410                 | -4.26            |
| Rhodobacterales (100)  | 0.465           | 0.581      | 236930                 | 264740                 | 4.14             |
| SAR11_clade (100)      | 0.754           | 0.754      | 6347100                | 6518400                | 4.93             |
| Flavobacteriales (100) | 0.028           | 0.141      | 1119200                | 750810                 | -5.27            |

**D**

| <b>Classes</b>            | <b>P values</b> | <b>FDR</b> | <b>Control samples</b> | <b>Treated samples</b> | <b>LDA score</b> |
|---------------------------|-----------------|------------|------------------------|------------------------|------------------|
| Bacteroidia (100)         | 0.028           | 0.113      | 1119200                | 750810                 | -5.27            |
| Gammaproteobacteria (100) | 0.347           | 0.620      | 2047200                | 2252600                | 5.01             |
| Acidimicrobiia (100)      | 0.465           | 0.620      | 249540                 | 213410                 | -4.26            |
| Alphaproteobacteria (100) | 0.754           | 0.754      | 6584000                | 6783200                | 5.00             |

Supplementary Table 3. Similarity percentage (SIMPER) analysis showing the percentage of specific and cumulative values of the Bray-Curtis dissimilarity indices by the top 20 most influential OTUs responsible for differentiating the community structure between the samples. SIMPER analysis was performed based on the normalized (rarified) abundance data of the obtained OTUs of each sample using the R software version 4.1.2 (Oksanen, 2015).

| SL. No. | OTUs     | Specific                                | Cumulative                              | Genera/ Taxa                                  |
|---------|----------|-----------------------------------------|-----------------------------------------|-----------------------------------------------|
|         |          | Bray-Curtis<br>dissimilarity<br>indices | Bray-Curtis<br>dissimilarity<br>indices |                                               |
| 1       | Otu00001 | 0.111                                   | 0.111                                   | SAR11_clade (Alphaproteobacteria)             |
| 2       | Otu00002 | 0.090                                   | 0.201                                   | <i>Alteromonas</i> (Gammaproteobacteria)      |
| 3       | Otu00007 | 0.047                                   | 0.249                                   | <i>Alteromonas</i> (Gammaproteobacteria)      |
| 4       | Otu00016 | 0.033                                   | 0.282                                   | <i>Photobacterium</i> (Gammaproteobacteria)   |
| 5       | Otu00013 | 0.030                                   | 0.312                                   | <i>Aurantivirga</i> (Bacteroidota)            |
| 6       | Otu00005 | 0.028                                   | 0.341                                   | <i>Prochlorococcus</i> (Cyanobacteria)        |
| 7       | Otu00008 | 0.025                                   | 0.365                                   | SAR11_clade (Alphaproteobacteria)             |
| 8       | Otu00009 | 0.024                                   | 0.389                                   | SAR86_clade (Gammaproteobacteria)             |
| 9       | Otu00006 | 0.023                                   | 0.412                                   | SAR86_clade (Gammaproteobacteria)             |
| 10      | Otu00020 | 0.021                                   | 0.433                                   | <i>Alcanivorax</i> (Gammaproteobacteria)      |
| 11      | Otu00017 | 0.020                                   | 0.453                                   | <i>Alteromonas</i> (Gammaproteobacteria)      |
| 12      | Otu00011 | 0.017                                   | 0.469                                   | SUP05_cluster (Gammaproteobacteria)           |
| 13      | Otu00004 | 0.016                                   | 0.485                                   | SAR11_clade (Alphaproteobacteria)             |
| 14      | Otu00014 | 0.013                                   | 0.498                                   | NS5_marine_group (Bacteroidota)               |
| 15      | Otu00019 | 0.012                                   | 0.510                                   | SAR11_clade (Alphaproteobacteria)             |
| 16      | Otu00018 | 0.012                                   | 0.522                                   | SAR11_clade (Alphaproteobacteria)             |
| 17      | Otu00022 | 0.011                                   | 0.533                                   | <i>Rhodobacteraceae</i> (Alphaproteobacteria) |
| 18      | Otu00003 | 0.010                                   | 0.543                                   | <i>Vibrio</i> (Gammaproteobacteria)           |
| 19      | Otu00023 | 0.009                                   | 0.553                                   | SAR11_clade (Alphaproteobacteria)             |
| 20      | Otu00035 | 0.008                                   | 0.560                                   | Bacteria_unclassified                         |

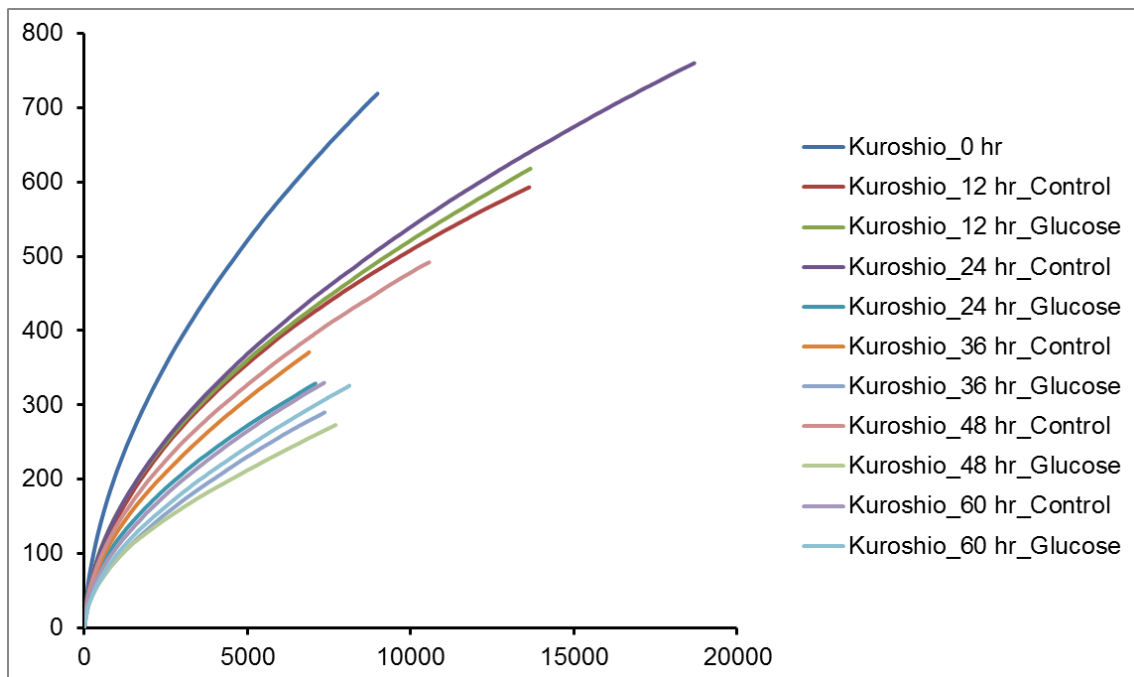

Supplementary Figure 1. Rarefaction curves at different time intervals in the shipboard microcosm experiments with the water collected from the Kuroshio Current during the KH-14-2 cruise in May-June 2014 showing the number of observed OTUs at 0.03 cut-off levels.

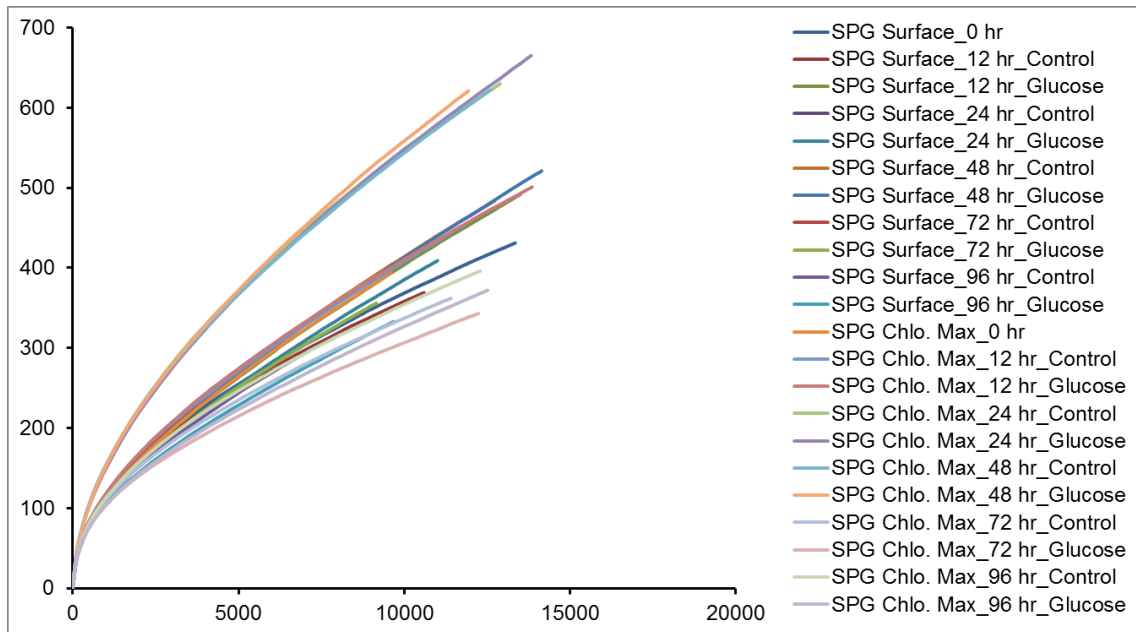

Supplementary Figure 2. Rarefaction curves at different time intervals in the shipboard microcosm experiments with the water collected from the North Pacific Sub-polar Gyre (SPG) in the western North Pacific Ocean during the KH-14-2 cruise in May-June 2014 showing the number of observed OTUs at 0.03 cut-off levels.

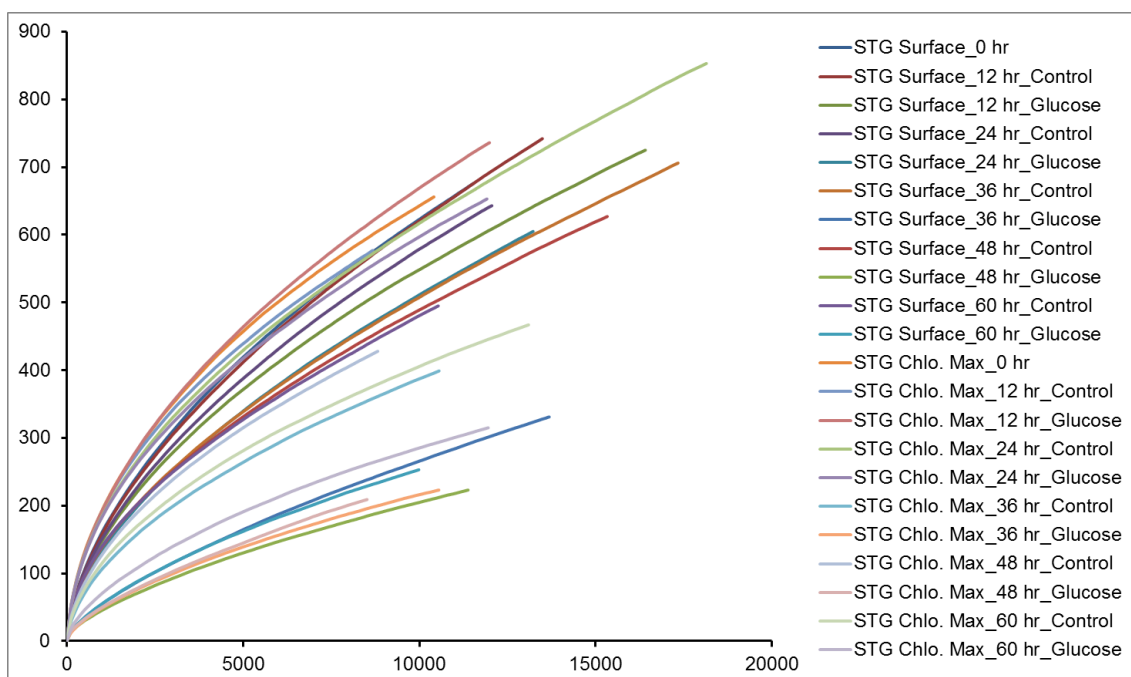

Supplementary Figure 3. Rarefaction curves at different time intervals in the shipboard microcosm experiments with the water collected from the North Pacific Sub-tropical Gyre (STG) in western North Pacific Ocean during the KH-14-2 cruise in May-June 2014 showing the number of observed OTUs at 0.03 cut-off levels.
